# Supplementary material
Source: PubMed Central journal article supplement (PMC4386068)
Supplement: NIHMS675008-supplement-Supplementary_Information.pdf [file NIHMS675008-supplement-Supplementary_Information.pdf]

Supporting Information: A Virtual Screen  
Discovers Novel, Fragment-Sized Inhibitors of  
*Mycobacterium tuberculosis* InhA

Alexander L. Perryman<sup>1,2\*‡</sup>, Weixuan Yu<sup>3‡</sup>, Xin Wang<sup>4</sup>, Sean Ekins<sup>5,6</sup>, Stefano Forli<sup>1</sup>, Shao-Gang Li<sup>2</sup>, Joel S. Freundlich<sup>2,4</sup>, Peter J. Tonge<sup>3</sup>, and Arthur J. Olson<sup>1</sup>

<sup>1</sup>Department of Integrative Structural and Computational Biology, The Scripps Research Institute, La Jolla, CA, USA.

<sup>2</sup>Center for Emerging & Re-emerging Pathogens, Division of Infectious Diseases, Department of Medicine, Rutgers University-New Jersey Medical School, Newark, NJ, USA.

<sup>3</sup>Institute for Chemical Biology & Drug Discovery, Department of Chemistry, Stony Brook University, Stony Brook, NY, USA.

<sup>4</sup>Department of Pharmacology & Physiology, Rutgers University-New Jersey Medical School, Newark, NJ, USA.

<sup>5</sup>Collaborations in Chemistry, 5616 Hilltop Needmore Road, Fuquay-Varina, NC, USA.

<sup>6</sup>Collaborative Drug Discovery, 1633 Bayshore Highway, Suite 342, Burlingame, CA, USA.

**Corresponding Author** E-mail: [Alex.L.Perryman@rutgers.edu](mailto:Alex.L.Perryman@rutgers.edu)

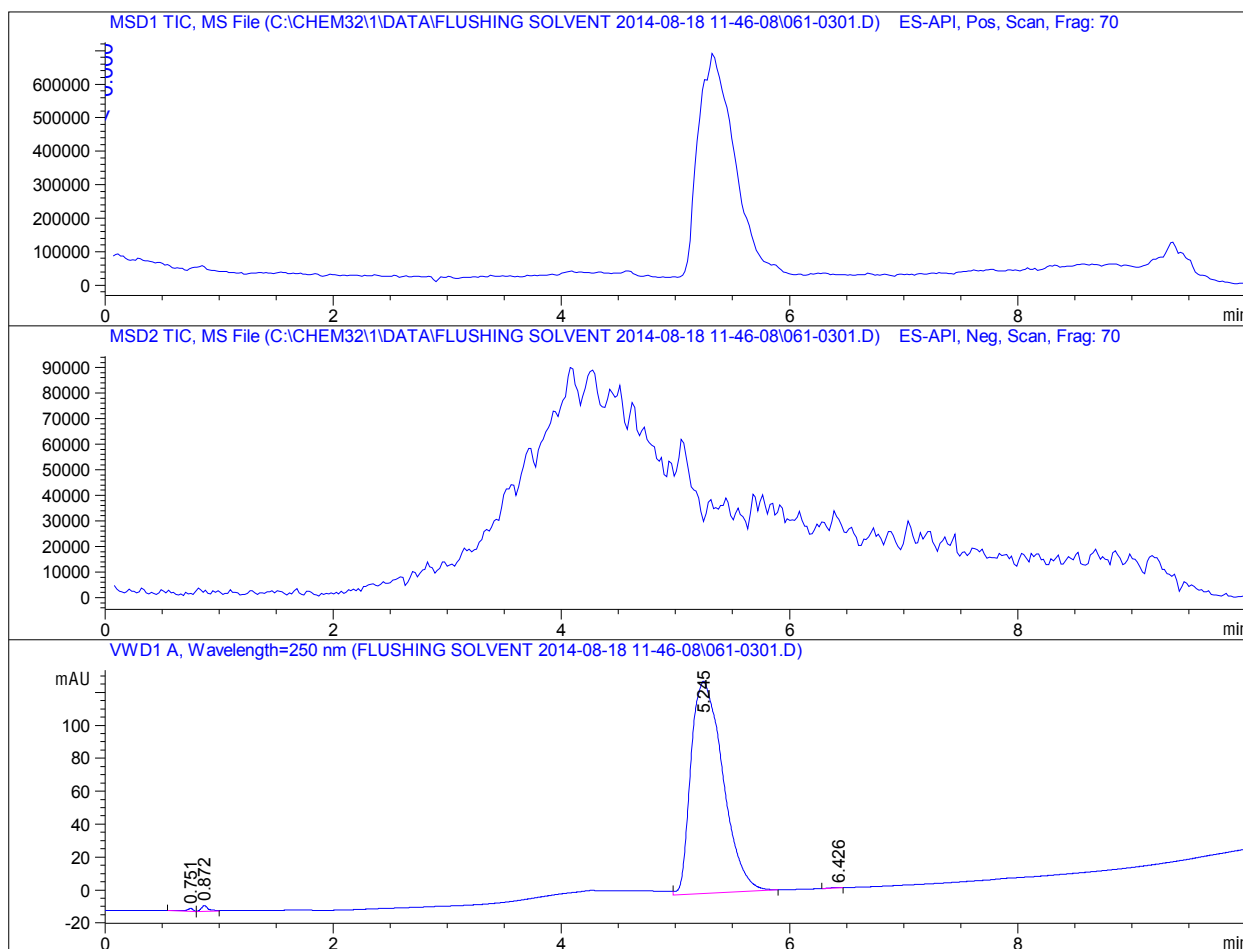

Signal 3: VWD1 A, Wavelength=250 nm

| Peak # | RetTime [min] | Type | Width [min] | Area [mAU*s] | Height [mAU] | Area %  |
|--------|---------------|------|-------------|--------------|--------------|---------|
| 1      | 0.751         | BB   | 0.0606      | 7.39936      | 1.77554      | 0.2924  |
| 2      | 0.872         | BV   | 0.0649      | 16.23327     | 3.58137      | 0.6415  |
| 3      | 5.245         | VB   | 0.2830      | 2505.29712   | 128.74850    | 99.0092 |
| 4      | 6.426         | BB   | 0.1322      | 1.43855      | 1.70840e-1   | 0.0569  |

Totals : 2530.36830 134.27625

**Figure S1.** LC-MS (Liquid Chromatography coupled with Mass Spectroscopy) indicates the sample of NCI 99389 was 99% pure. The top image shows the peaks for positively charged ions, the middle image displays the negatively charged ions, and the bottom image displays all peaks detected at 250 nm. The table contains the retention times and area under the curve values for all peaks detected at 250 nm, with peak 3 corresponding to the expected mass/charge of NCI 99389.

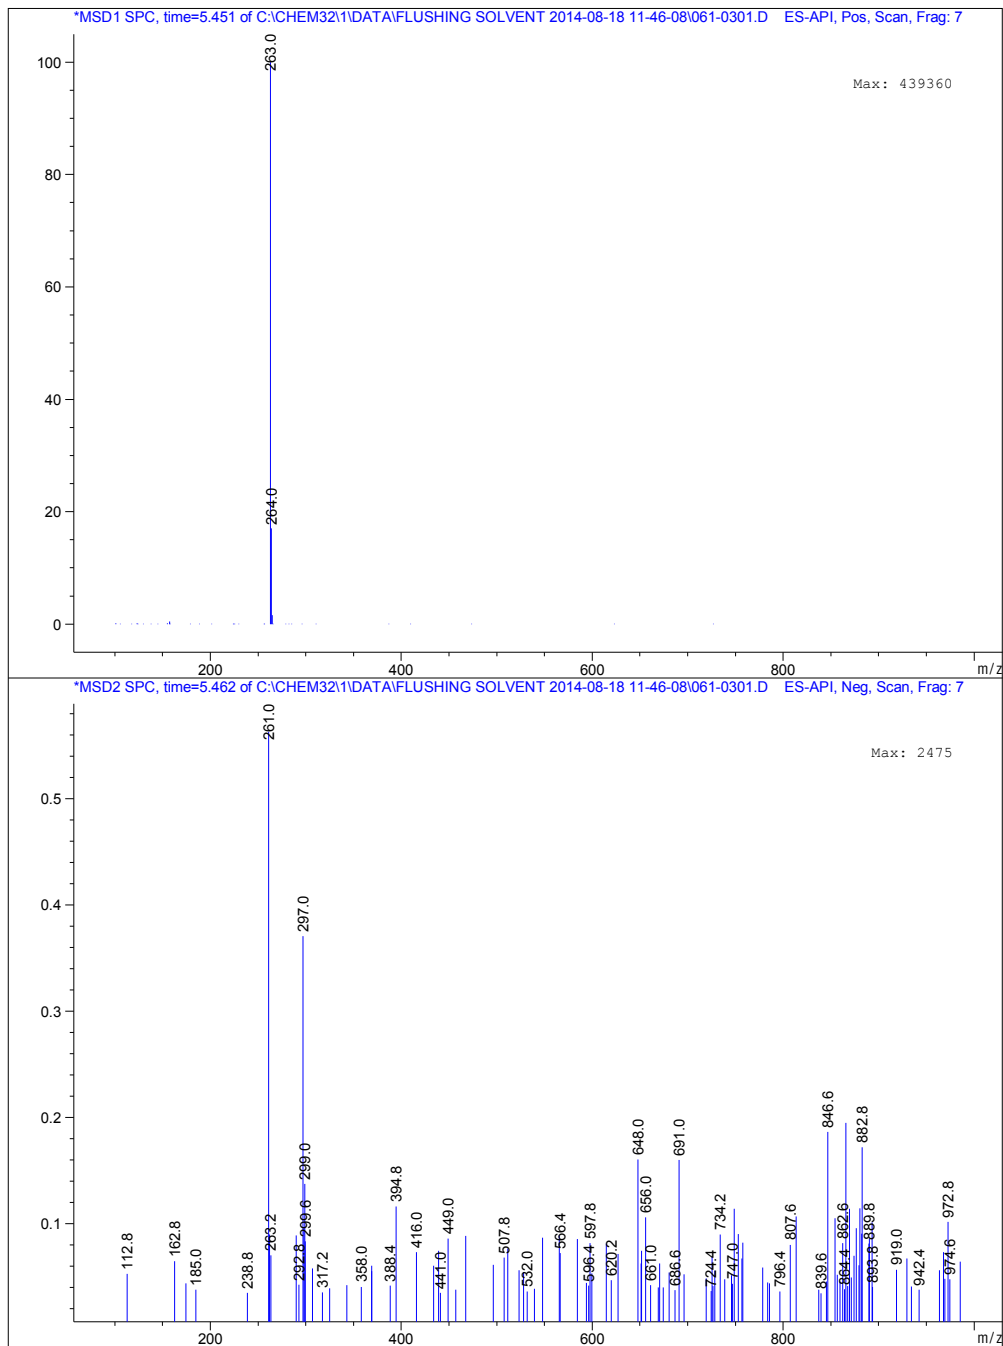

**Figure S2.** Mass spectra shows the mass of 263 ( $M+1$ )<sup>+</sup>, which is consistent with NCI 99389. The top image displays the mass per charge for positively charged ions, while the bottom image shows the mass per charge for negatively charged ions.

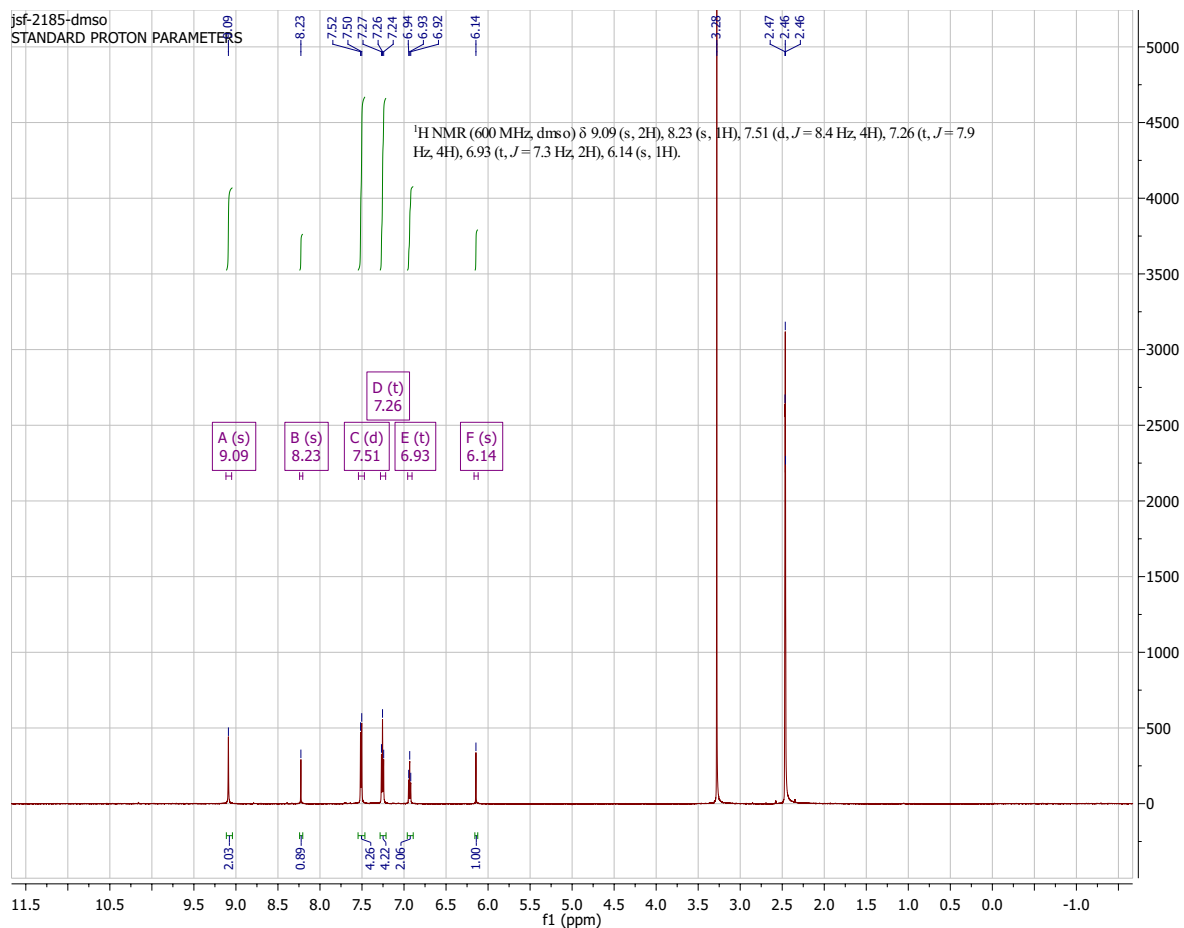

**Figure S3.** Proton NMR indicates the sample of NCI 99389 had the expected 2D structure. The compound was dissolved in deuterated DMSO and produced the following signal, using a 600 MHz NMR machine:  $\delta$  9.09 (s, 2H), 8.23 (s, 1H), 7.51 (d,  $J = 8.4$  Hz, 4H), 7.26 (t,  $J = 7.9$  Hz, 4H), 6.93 (t,  $J = 7.3$  Hz, 2H), 6.14 (s, 1H).

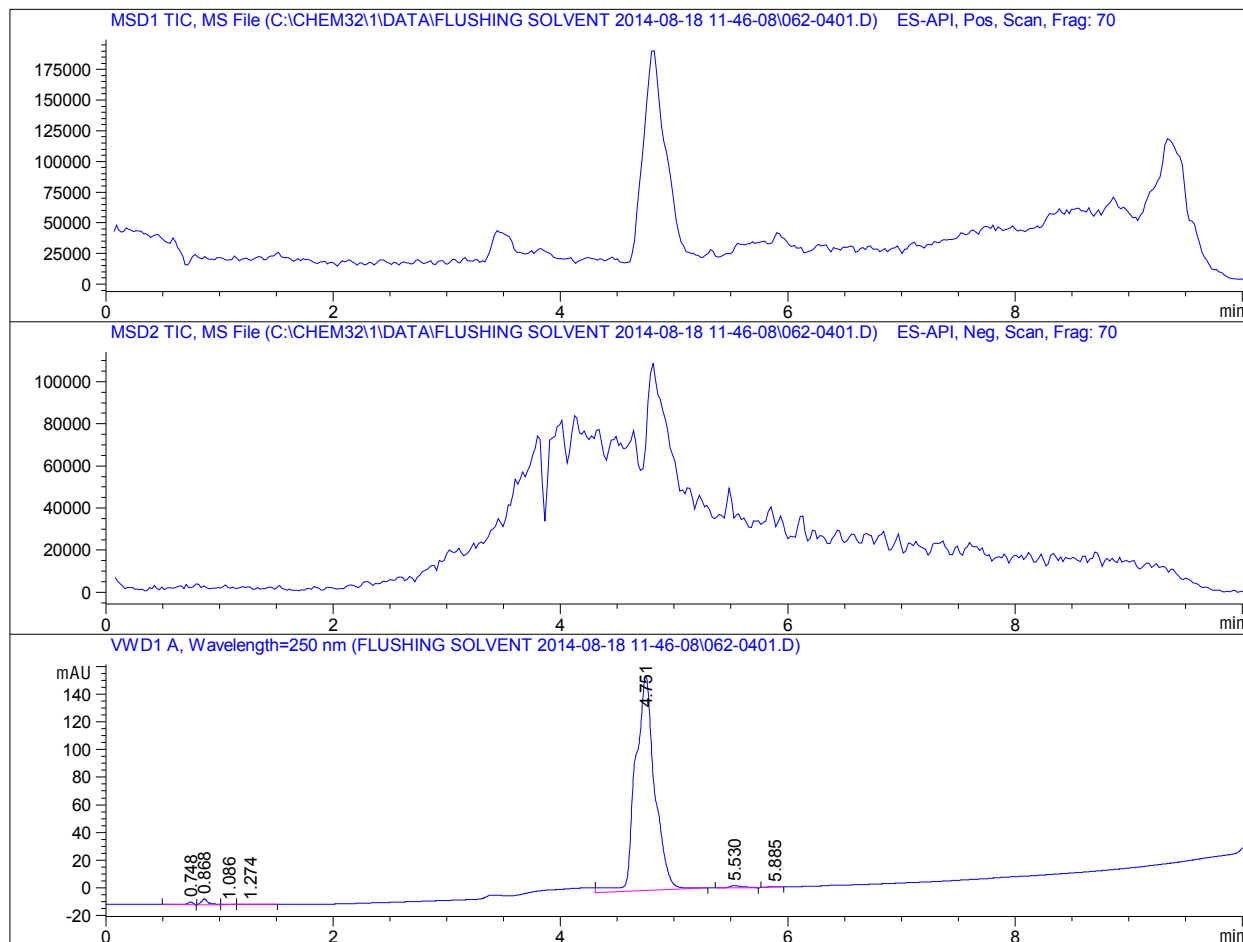

Signal 1: VWD1 A, Wavelength=250 nm

| Peak # | RetTime [min] | Type | Width [min] | Area [mAU*s] | Height [mAU] | Area %  |
|--------|---------------|------|-------------|--------------|--------------|---------|
| 1      | 0.748         | BB   | 0.0601      | 7.45916      | 1.88903      | 0.3988  |
| 2      | 0.868         | BV   | 0.0654      | 17.38281     | 4.10563      | 0.9293  |
| 3      | 1.086         | VV   | 0.1032      | 2.03760      | 2.92832e-1   | 0.1089  |
| 4      | 1.274         | VB   | 0.1999      | 2.55657      | 1.73470e-1   | 0.1367  |
| 5      | 4.751         | VB   | 0.1594      | 1826.92542   | 155.10576    | 97.6640 |
| 6      | 5.530         | BB   | 0.1154      | 12.12564     | 1.54783      | 0.6482  |
| 7      | 5.885         | BB   | 0.1075      | 2.13630      | 3.21764e-1   | 0.1142  |

Totals : 1870.62349 163.43631

**Figure S4.** LC-MS indicates the sample of NCI 111591 was > 97% pure. The top image shows the peaks for positively charged ions, the middle image displays the negatively charged ions, and the bottom image displays all peaks detected at 250 nm. The table contains the retention times and area under the curve values for all peaks detected at 250 nm, with peak 5 corresponding to the expected mass/charge of NCI 111591.

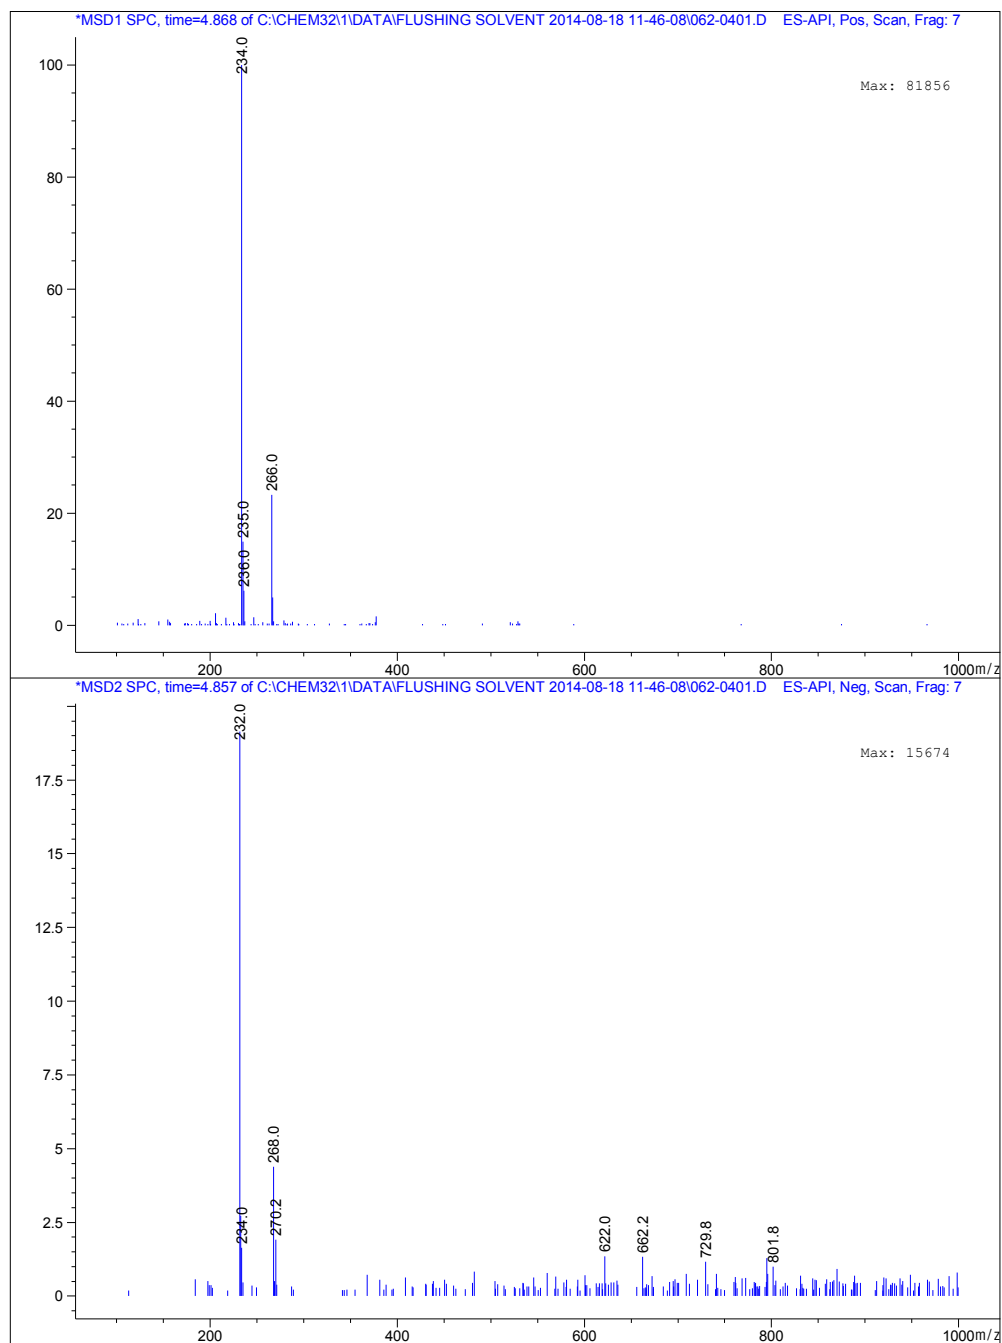

**Figure S5.** Mass spectra shows the mass of 234 ( $M+1$ )<sup>+</sup>, which is consistent with NCI 111591. The top image displays the mass/charge for positively charged ions, while the bottom image shows the mass/charge for negatively charged ions.

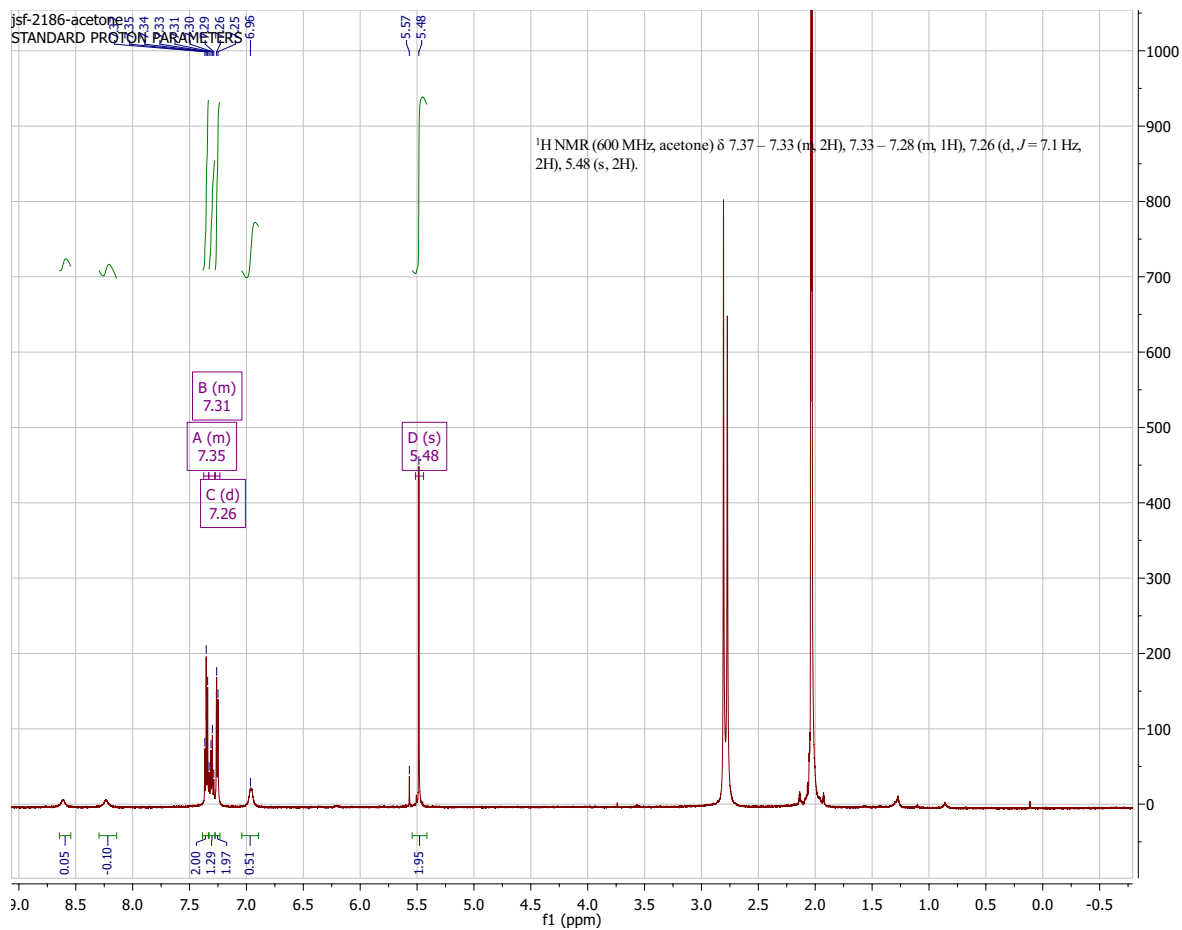

**Figure S6.** Proton NMR demonstrates that the sample of NCI 111591 had the expected 2D structure. The compound was dissolved in deuterated acetone and produced the following signal, using a 600 MHz NMR machine:  $\delta$  7.37 - 7.33 (m, 2H), 7.33 - 7.28 (m, 1H), 7.26 (d,  $J = 7.1$  Hz, 2H), 5.48 (s, 2H).

**Table S1.** Tanimoto Similarity of Each Novel Inhibitor Compared to the Other 7 New Inhibitors

| <b>NCI ID</b>                                   | <b>111590</b> | <b>111588</b> | <b>99389</b> | <b>111591</b> | <b>135809</b> | <b>196166</b> | <b>112144</b> | <b>111589</b> |
|-------------------------------------------------|---------------|---------------|--------------|---------------|---------------|---------------|---------------|---------------|
| <b>111590</b>                                   | <b>1.00</b>   | <b>0.78</b>   | <b>0.39</b>  | <b>0.71</b>   | <b>0.39</b>   | <b>0.54</b>   | <b>0.39</b>   | <b>0.83</b>   |
| <b>111588</b>                                   | <b>0.78</b>   | <b>1.00</b>   | <b>0.45</b>  | <b>0.78</b>   | <b>0.46</b>   | <b>0.55</b>   | <b>0.48</b>   | <b>0.84</b>   |
| <b>99389</b>                                    | <b>0.39</b>   | <b>0.45</b>   | <b>1.00</b>  | <b>0.49</b>   | <b>0.43</b>   | <b>0.41</b>   | <b>0.33</b>   | <b>0.41</b>   |
| <b>111591</b>                                   | <b>0.71</b>   | <b>0.78</b>   | <b>0.49</b>  | <b>1.00</b>   | <b>0.57</b>   | <b>0.48</b>   | <b>0.38</b>   | <b>0.72</b>   |
| <b>135809</b>                                   | <b>0.39</b>   | <b>0.46</b>   | <b>0.43</b>  | <b>0.57</b>   | <b>1.00</b>   | <b>0.36</b>   | <b>0.34</b>   | <b>0.45</b>   |
| <b>196166</b>                                   | <b>0.54</b>   | <b>0.55</b>   | <b>0.41</b>  | <b>0.48</b>   | <b>0.36</b>   | <b>1.00</b>   | <b>0.41</b>   | <b>0.48</b>   |
| <b>112144</b>                                   | <b>0.39</b>   | <b>0.48</b>   | <b>0.33</b>  | <b>0.38</b>   | <b>0.34</b>   | <b>0.41</b>   | <b>1.00</b>   | <b>0.41</b>   |
| <b>111589</b>                                   | <b>0.83</b>   | <b>0.84</b>   | <b>0.41</b>  | <b>0.72</b>   | <b>0.45</b>   | <b>0.48</b>   | <b>0.41</b>   | <b>1.00</b>   |
| <b>Average Similarity to Other 7 Inhibitors</b> | <b>0.6</b>    | <b>0.6</b>    | <b>0.4</b>   | <b>0.6</b>    | <b>0.4</b>    | <b>0.5</b>    | <b>0.4</b>    | <b>0.6</b>    |
| <b>Maximum Similarity to the Other 7</b>        | <b>0.8</b>    | <b>0.8</b>    | <b>0.5</b>   | <b>0.8</b>    | <b>0.6</b>    | <b>0.6</b>    | <b>0.5</b>    | <b>0.8</b>    |
| <b>Scaffold # Using a Cutoff &gt; 0.7</b>       | <b>2</b>      | <b>2</b>      | <b>1</b>     | <b>2</b>      | <b>4</b>      | <b>5</b>      | <b>3</b>      | <b>2</b>      |
